# Supplementary material for: Non-synonymous to synonymous substitutions suggest that orthologs tend to keep their functions, while paralogs are a source of functional novelty
Source: PeerJ journal article supplement (doi:10.7717/peerj.13843), 2022-08-31
Supplement: Supplementary-Figures.pdf [file Supplementary-Figures.pdf]

## Supplementary figures

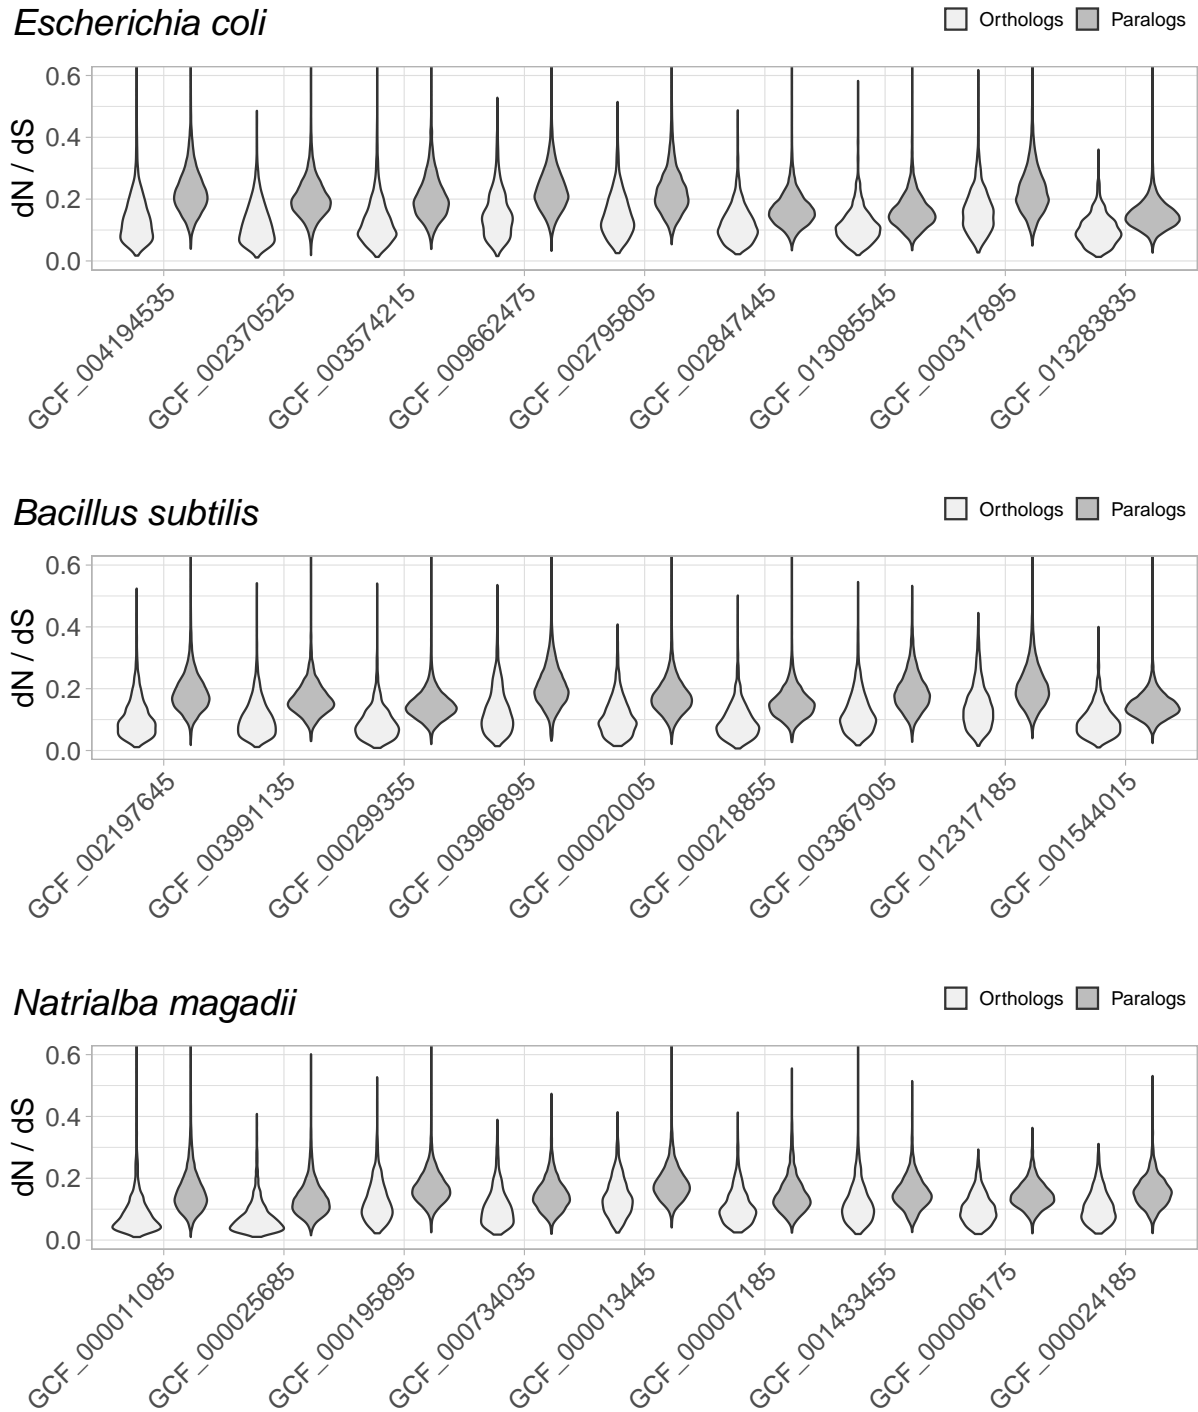

Figure S1: Full  $dN/dS$  results obtained with InParanoid as a working definition of orthology.

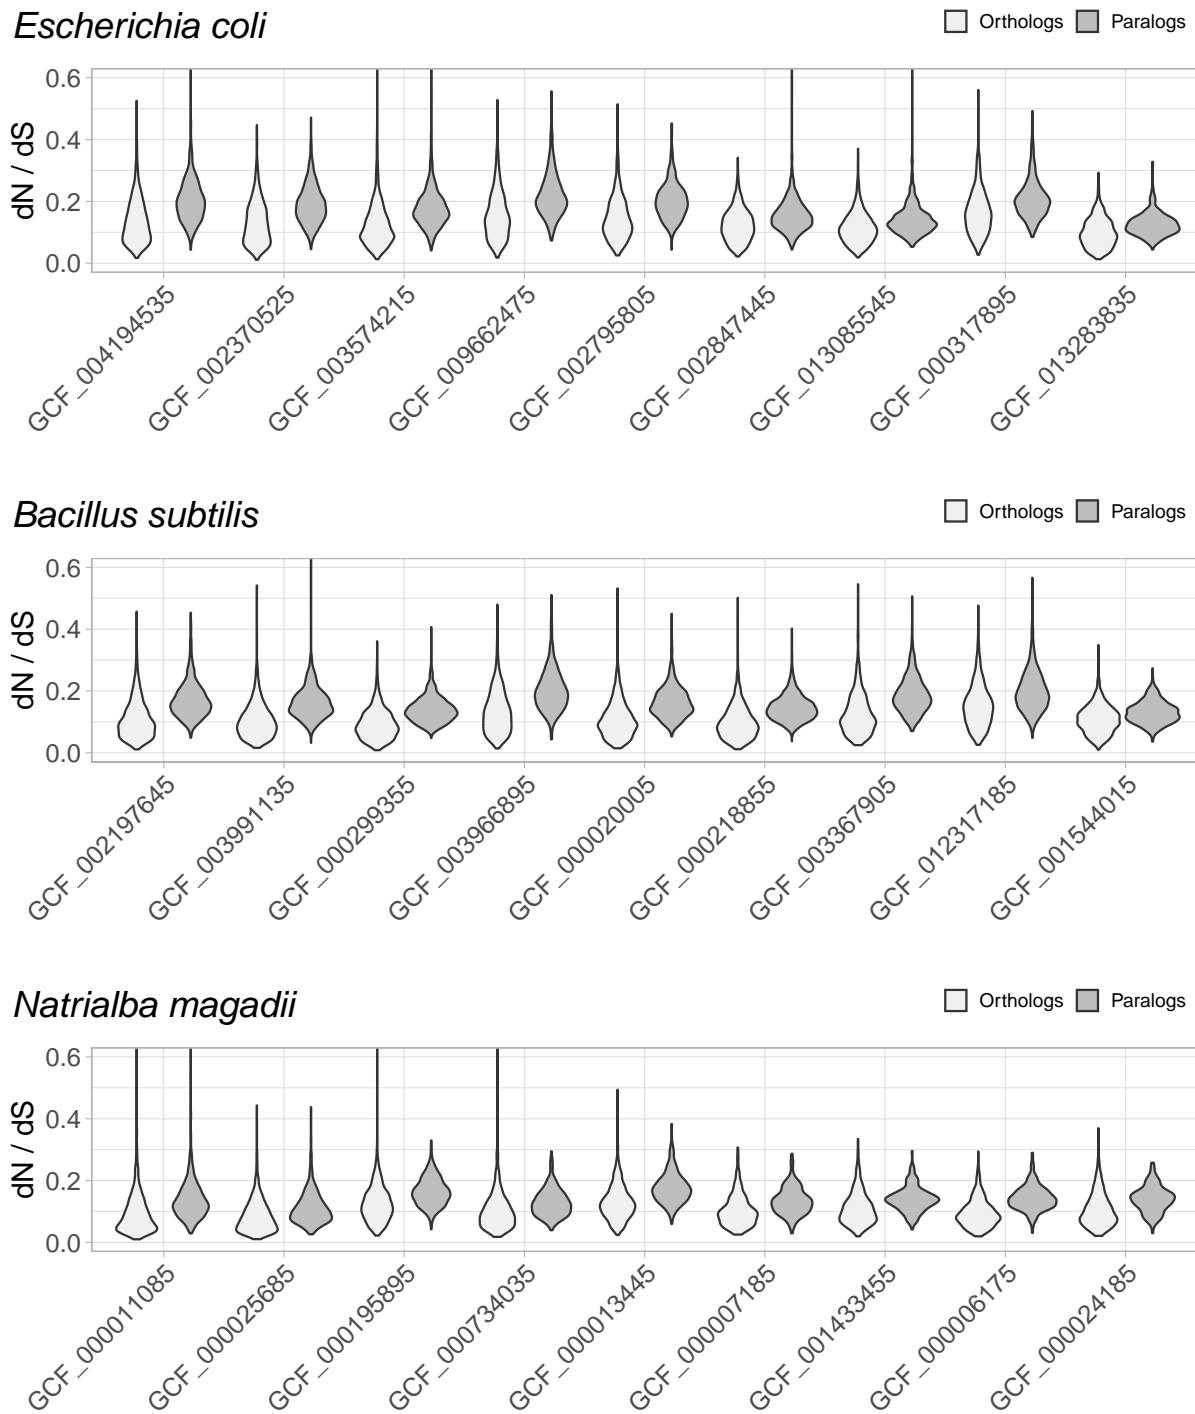

Figure S2: Full  $dN/dS$  results obtained with the Orthologous Matrix (OMA) working definition of orthology.

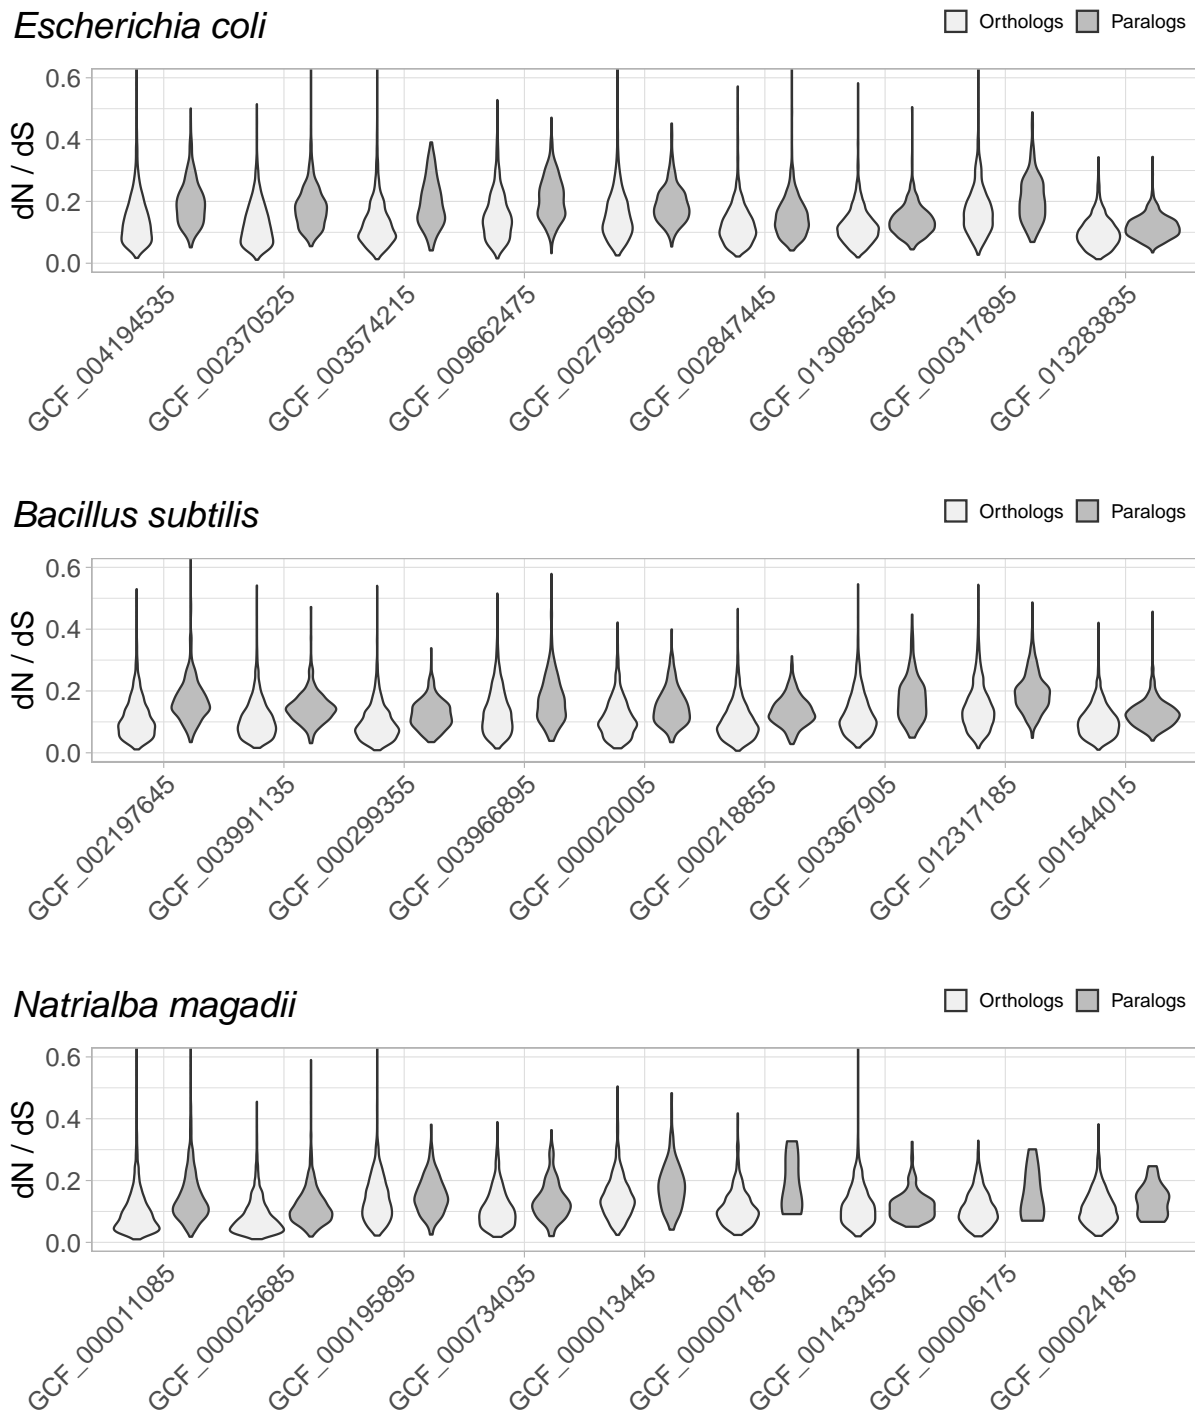

Figure S3: Full  $dN/dS$  results obtained with the OrthoFinder working definition of orthology.

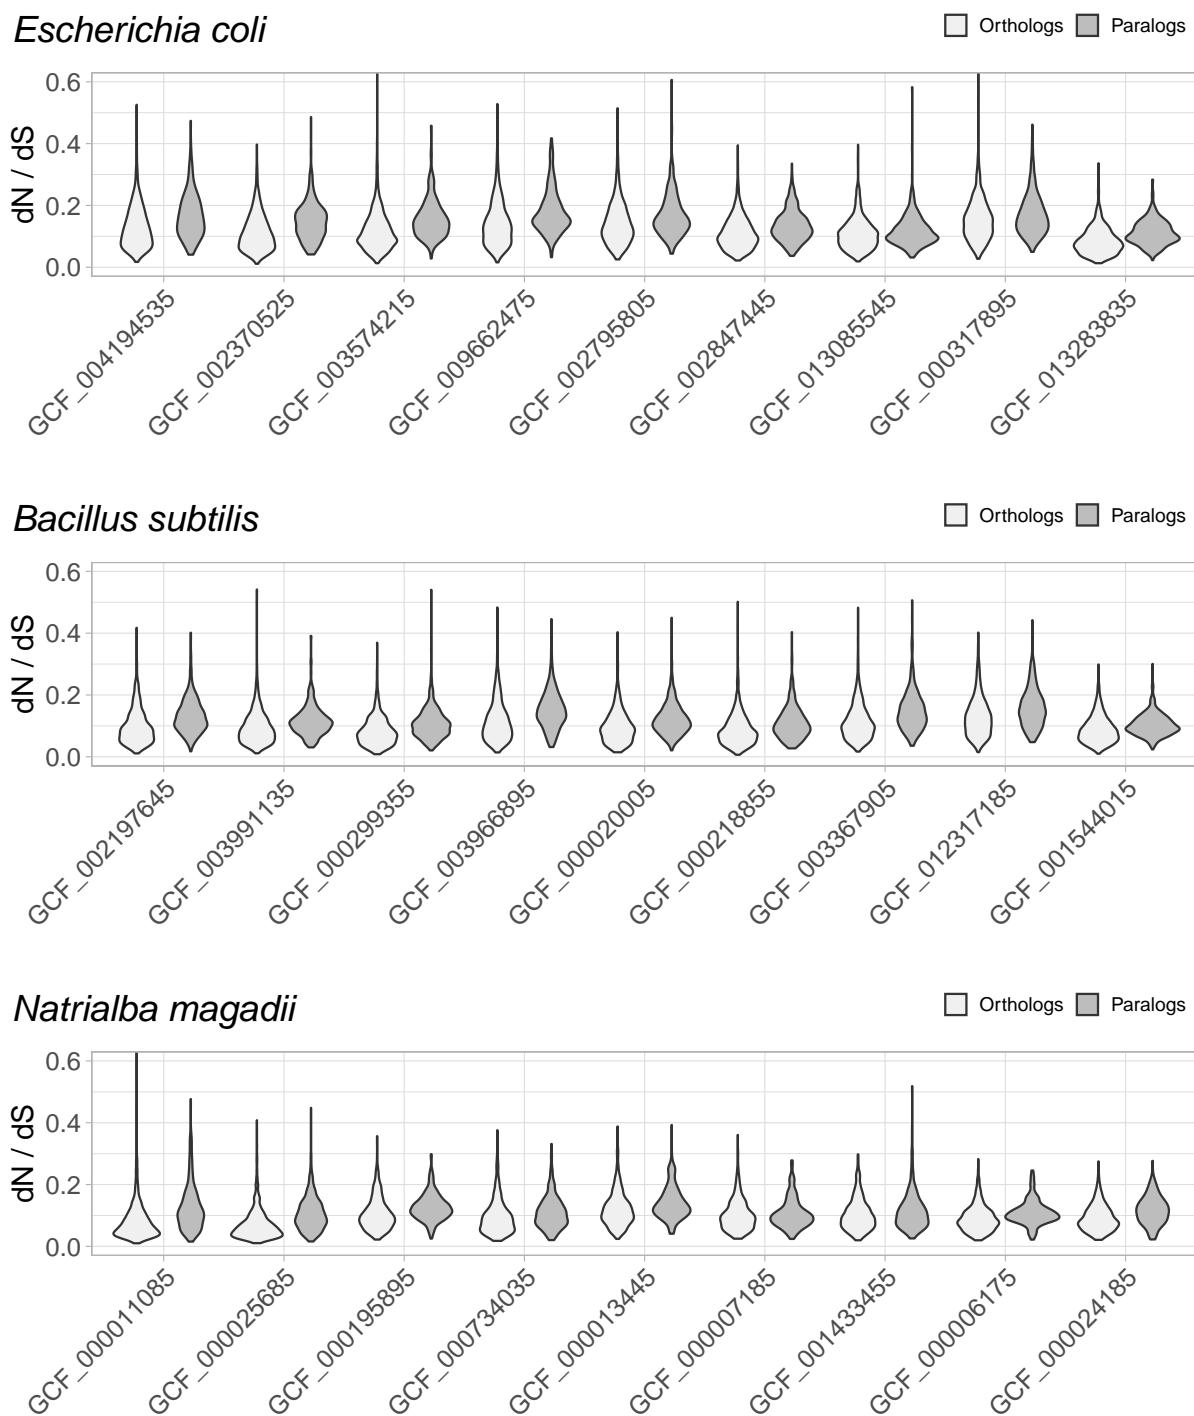

Figure S4: Full  $dN/dS$  results obtained with the ProteinOrtho working definition of orthology.

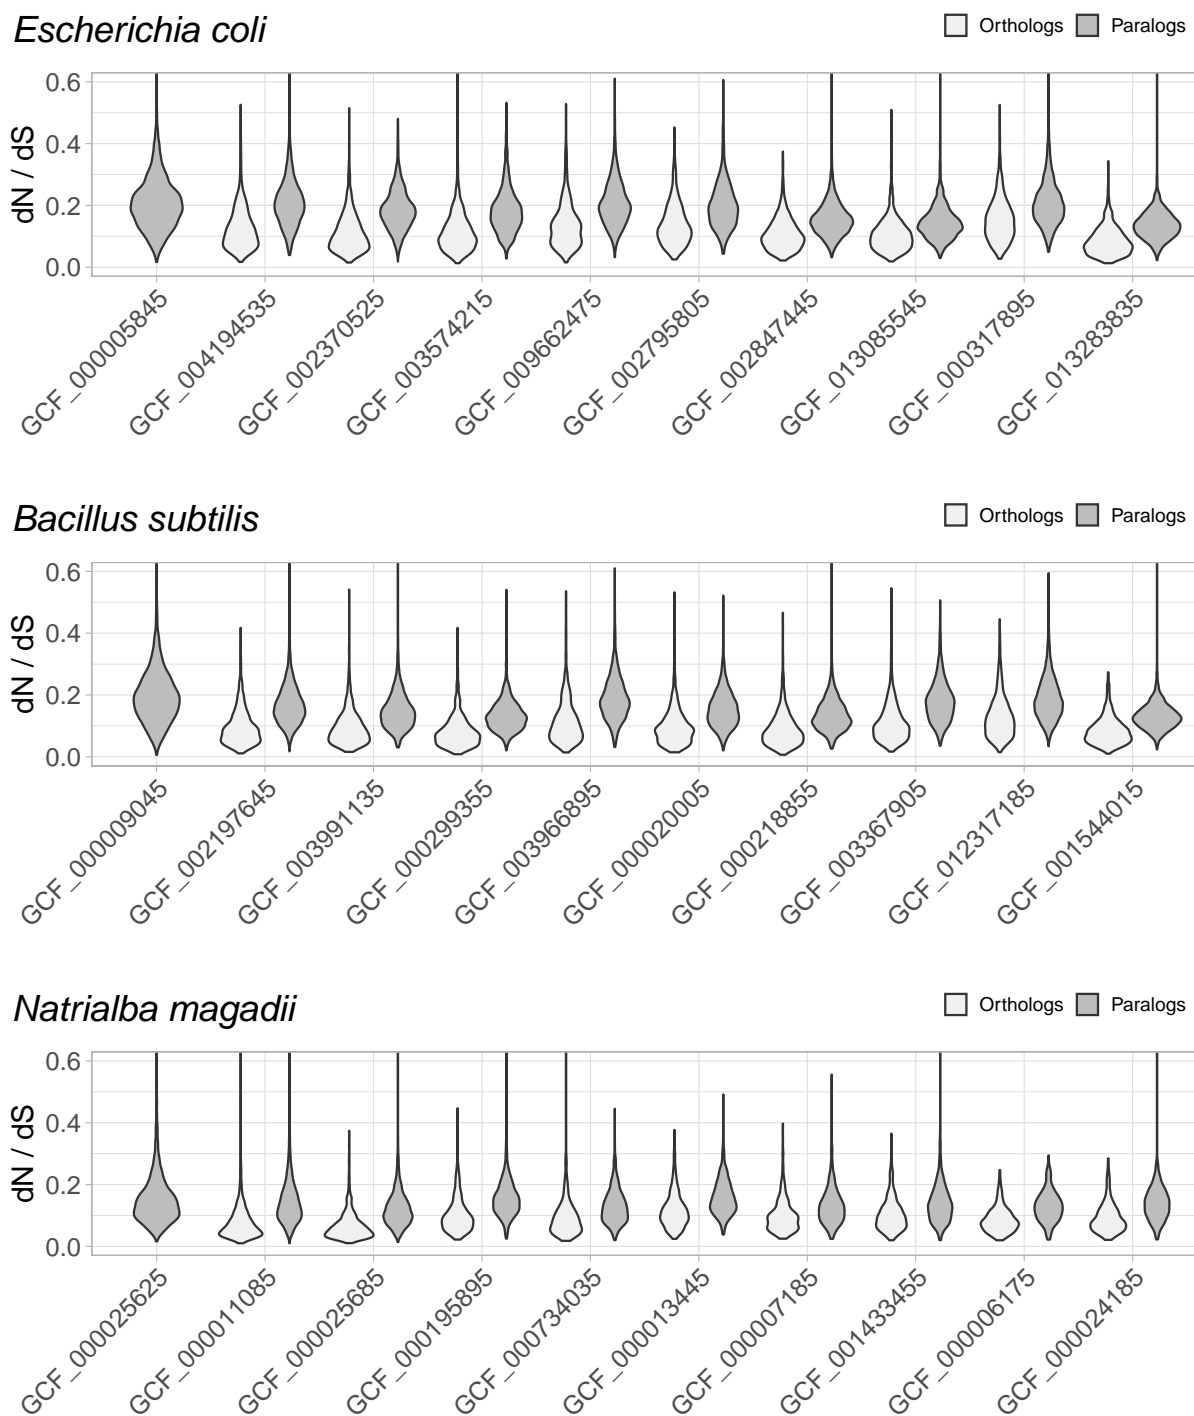

Figure S5: Full  $dN/dS$  results obtained with alignments covering at least 80% of both proteins.

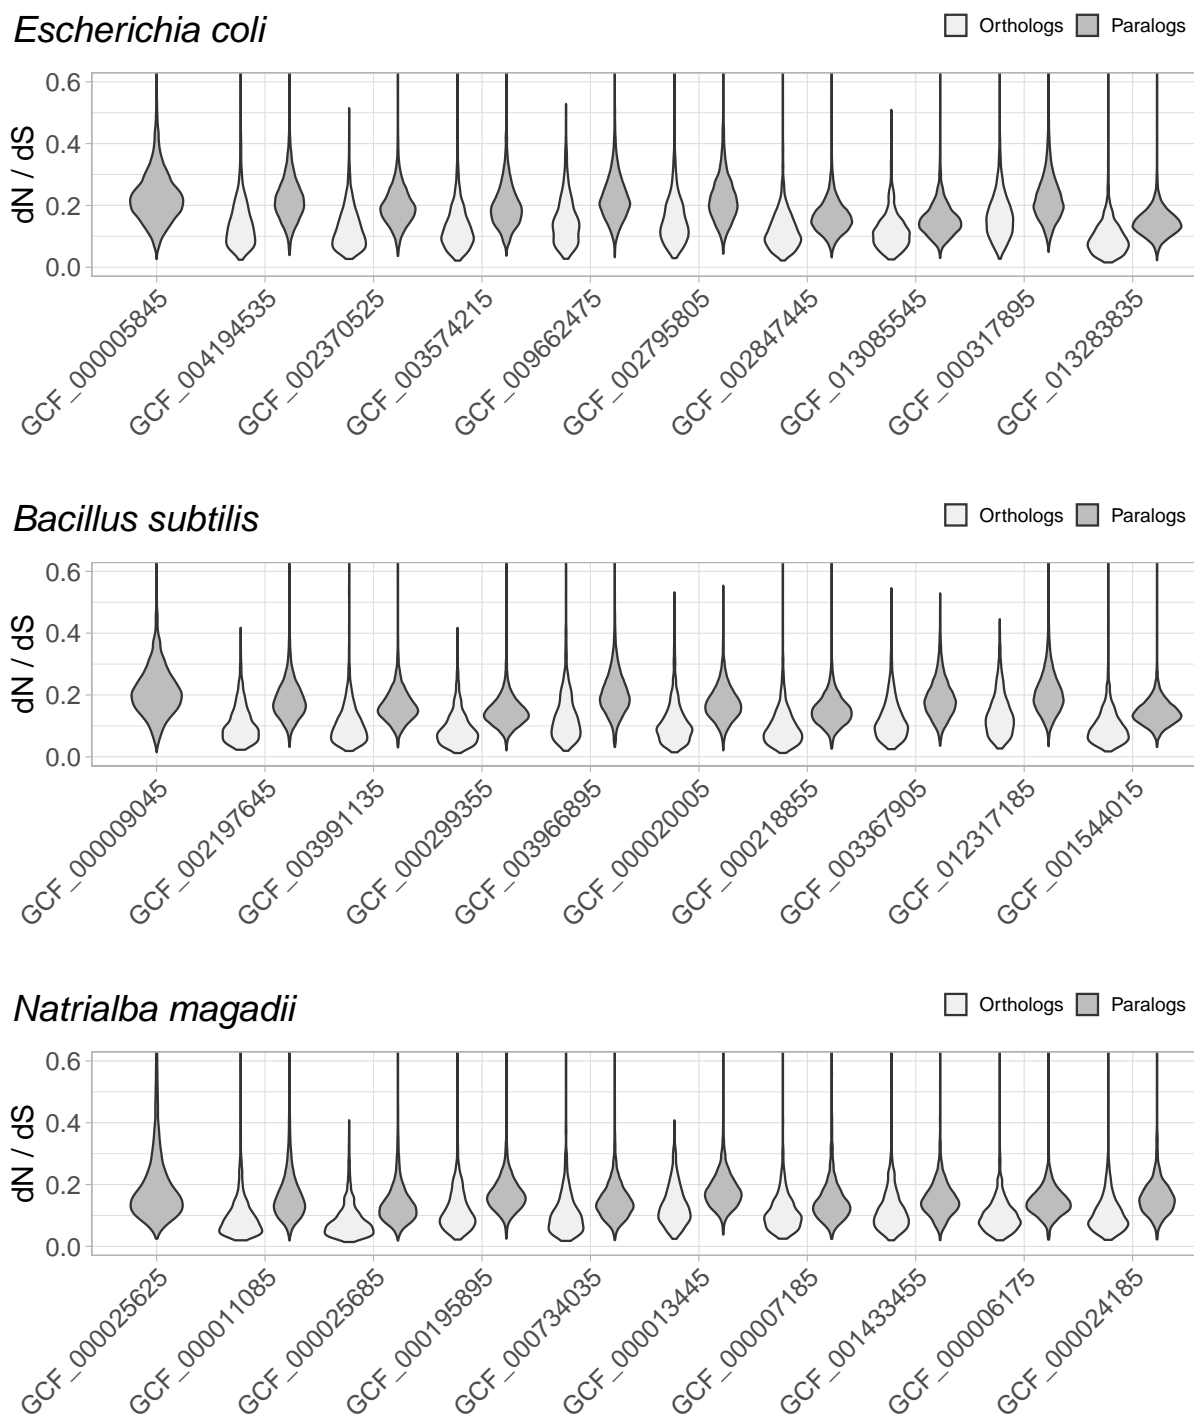

Figure S6: Full  $dN/dS$  results obtained with proteins no more that 70% identical.

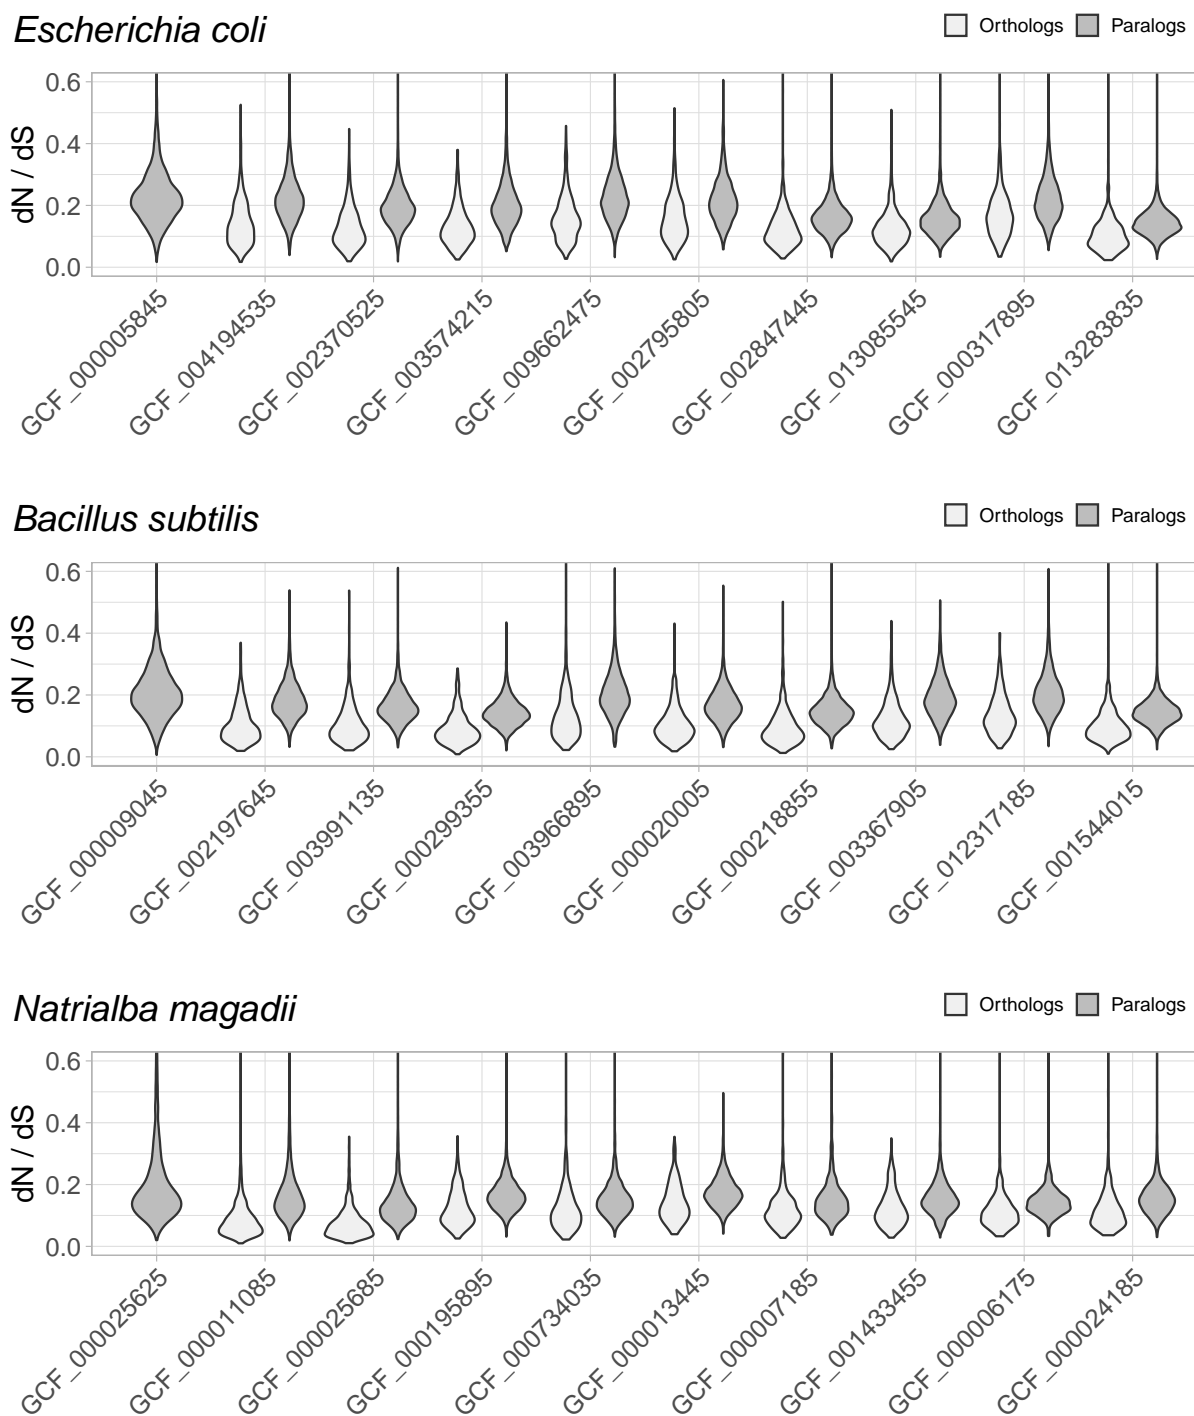

Figure S7: Full  $dN/dS$  results obtained with proteins within usual codon usage.

*Escherichia coli*

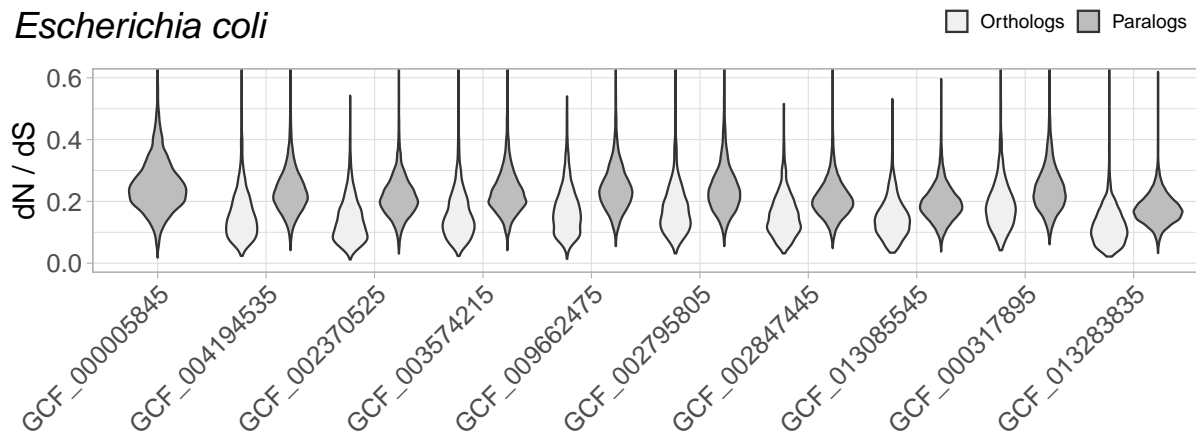

*Bacillus subtilis*

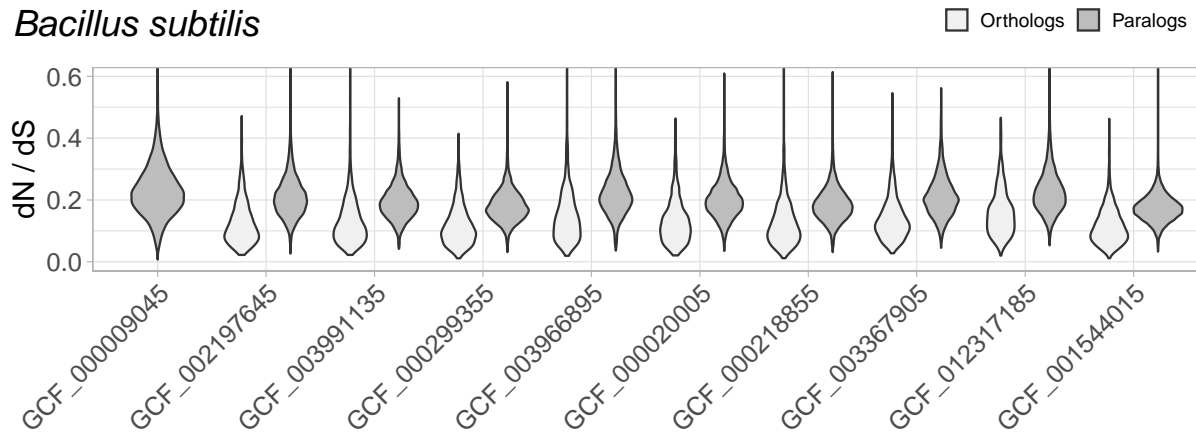

*Natrialba magadii*

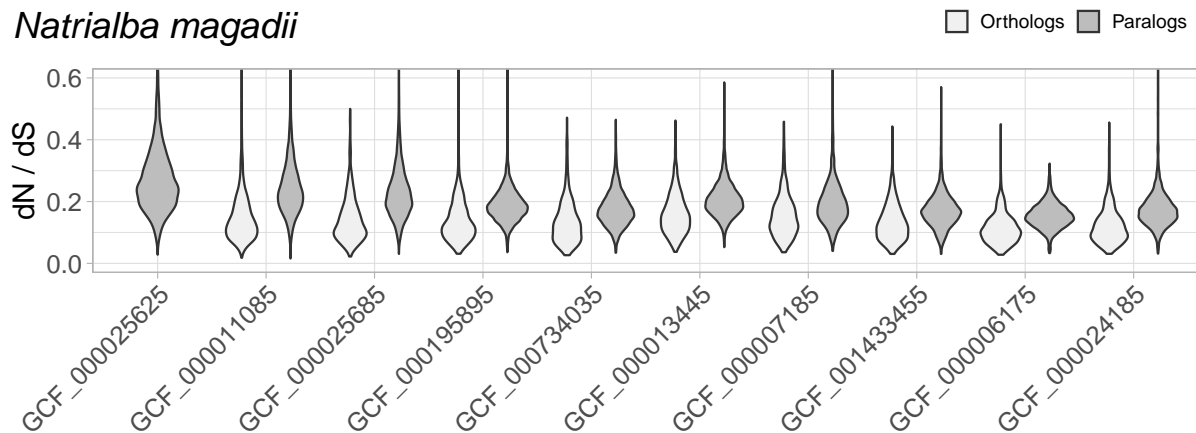

Figure S8: Full  $dN/dS$  results using Muse and Gaut's estimate of background codon frequencies.
